# Supplementary material for: Prevalence of incidental intracranial findings on magnetic resonance imaging: a systematic review and meta-analysis
Source: PubMed Central journal article supplement (PMC9519720; doi:10.1007/s00701-022-05225-7), 2022-05-08
Supplement: 701_2022_5225_MOESM1_ESM.pdf [file 701_2022_5225_MOESM1_ESM.pdf]

## *Supplementary Information*

# **Prevalence of incidental intracranial findings on magnetic resonance imaging: A systematic review and meta-analysis**

**Divya Elizabeth Sunny**<sup>1,2</sup>, Michael Amoo, MB, MCh, MRCS<sup>1,3</sup>, Maryam Al Breiki<sup>1,2</sup>, Elite Dong Wen Teng<sup>1,2</sup>, Jack Henry, BSc<sup>1,2</sup>, Mohsen Javadpour, MB, BCh, FRCS(SN)<sup>1,3,4</sup>

### **Author Affiliations**

1. National Neurosurgical Centre, Beaumont Hospital, Dublin, Ireland.
2. School of Medicine, University College Dublin, Dublin, Ireland.
3. University of Medical and Health Sciences, Royal College of Surgeons Ireland, Dublin, Ireland.
4. Department of Academic Neurology, Trinity College Dublin, Dublin, Ireland

### **Corresponding Author**

Michael Amoo

National Neurosurgical Centre, Beaumont Hospital, Dublin 9, Ireland

E: michaelamoo@rcsi.ie

### **Post-publication Correspondence:**

Michael Amoo

National Neurosurgical Centre, Beaumont Hospital, Dublin 9, Ireland

E: michaelamoo@rcsi.ie

Twitter: @mikeamoojr

Prof. Mohsen Javadpour

National Neurosurgical Centre, Beaumont Hospital, Dublin 9, Ireland

E: mjavadpour@rcsi.ie

## Supplementary Methods I

### Ovid MEDLINE – Inception to 24/05/2021 – 2,108 results

| #  | Query                                                                               | Results from 24 May 2021 |
|----|-------------------------------------------------------------------------------------|--------------------------|
| 1  | incidental.ti,ab.                                                                   | 28,619                   |
| 2  | exp Incidental Findings/<br>ct.ti,ab.                                               | 10,892                   |
| 3  | exp Magnetic Resonance Imaging/ or exp<br>Tomography, X-Ray Computed/<br>mri.ti,ab. | 362,366                  |
| 4  | magnetic resonance*.ti,ab.                                                          | 847,759                  |
| 5  | computed tomography.ti,ab.                                                          | 258,115                  |
| 6  | exp Brain/<br>neuroradiology.ti,ab.                                                 | 358,887                  |
| 7  | neuro*.ti,ab.                                                                       | 2,783                    |
| 8  | brain.ti,ab.                                                                        | 1,890,201                |
| 9  | head.ti,ab.                                                                         | 1,019,915                |
| 10 | cranial.ti,ab.                                                                      | 334,357                  |
| 11 | cerebral.ti,ab.                                                                     | 76,967                   |
| 12 | 1 or 2                                                                              | 362,919                  |
| 13 | 3 or 4 or 5 or 6 or 7                                                               | 34,715                   |
| 14 | 8 or 9 or 10 or 11 or 12 or 13 or 14                                                | 1,273,989                |
| 15 | 15 and 16 and 17                                                                    | 3,326,774                |
| 16 | limit 18 to humans                                                                  | 2,486                    |
| 17 |                                                                                     | 2,108                    |

## EMBASE – Inception to 24/05/2021 – 380 results

### Search Queries

| No. | Query                                                                                                                                                                                                                                                                                                                                                                                                                    | Results | Date        |
|-----|--------------------------------------------------------------------------------------------------------------------------------------------------------------------------------------------------------------------------------------------------------------------------------------------------------------------------------------------------------------------------------------------------------------------------|---------|-------------|
| #17 | ((('incidental finding'/exp OR 'incidental finding') AND ('computer assisted tomography'/exp OR 'ct':ab,ti OR 'computed tomography':ab,ti OR 'neuroradiology'/exp OR 'nuclear magnetic resonance imaging'/exp OR 'magnetic resonance imaging':ab,ti OR 'mri':ab,ti) AND ('brain'/exp OR neuro*:ab,ti OR head:ab,ti OR cranial:ab,ti)) AND [embase]/lim NOT ([embase]/lim AND [medline]/lim) NOT 'conference abstract'/it | 380     | 24 May 2021 |
| #16 | ((('incidental finding'/exp OR 'incidental finding') AND ('computer assisted tomography'/exp OR 'ct':ab,ti OR 'computed tomography':ab,ti OR 'neuroradiology'/exp OR 'nuclear magnetic resonance imaging'/exp OR 'magnetic resonance imaging':ab,ti OR 'mri':ab,ti) AND ('brain'/exp OR neuro*:ab,ti OR head:ab,ti OR cranial:ab,ti)) AND [embase]/lim NOT ([embase]/lim AND [medline]/lim)                              | 1011    | 24 May 2021 |
| #15 | ('incidental finding'/exp OR 'incidental finding') AND ('computer assisted tomography'/exp OR 'ct':ab,ti OR 'computed tomography':ab,ti OR 'neuroradiology'/exp OR 'nuclear magnetic resonance imaging'/exp OR 'magnetic resonance imaging':ab,ti OR 'mri':ab,ti) AND ('brain'/exp OR neuro*:ab,ti OR head:ab,ti OR cranial:ab,ti)                                                                                       | 2249    | 24 May 2021 |
| #14 | 'brain'/exp OR neuro*:ab,ti OR head:ab,ti OR cranial:ab,ti                                                                                                                                                                                                                                                                                                                                                               | 3758698 | 24 May 2021 |
| #13 | 'computer assisted tomography'/exp OR 'ct':ab,ti OR 'computed tomography':ab,ti OR 'neuroradiology'/exp OR 'nuclear magnetic resonance imaging'/exp OR 'magnetic resonance imaging':ab,ti OR 'mri':ab,ti                                                                                                                                                                                                                 | 2203543 | 24 May 2021 |
| #12 | cranial:ab,ti                                                                                                                                                                                                                                                                                                                                                                                                            | 105073  | 24 May 2021 |
| #11 | head:ab,ti                                                                                                                                                                                                                                                                                                                                                                                                               | 449588  | 24 May 2021 |
| #10 | neuro*:ab,ti                                                                                                                                                                                                                                                                                                                                                                                                             | 2534691 | 24 May 2021 |
| #9  | 'brain'/exp                                                                                                                                                                                                                                                                                                                                                                                                              | 1521819 | 24 May 2021 |
| #8  | 'mri':ab,ti                                                                                                                                                                                                                                                                                                                                                                                                              | 443977  | 24 May 2021 |
| #7  | 'magnetic resonance imaging':ab,ti                                                                                                                                                                                                                                                                                                                                                                                       | 292875  | 24 May 2021 |
| #6  | 'nuclear magnetic resonance imaging'/exp                                                                                                                                                                                                                                                                                                                                                                                 | 1023815 | 24 May 2021 |
| #5  | 'neuroradiology'/exp                                                                                                                                                                                                                                                                                                                                                                                                     | 90889   | 24 May 2021 |
| #4  | 'computed tomography':ab,ti                                                                                                                                                                                                                                                                                                                                                                                              | 329440  | 24 May 2021 |
| #3  | 'ct':ab,ti                                                                                                                                                                                                                                                                                                                                                                                                               | 610775  | 24 May 2021 |
| #2  | 'computer assisted tomography'/exp                                                                                                                                                                                                                                                                                                                                                                                       | 1175732 | 24 May 2021 |
| #1  | 'incidental finding'/exp OR 'incidental finding'                                                                                                                                                                                                                                                                                                                                                                         | 23805   | 24 May 2021 |

## PubMed – Inception to 24/05/2021 – 1,902 results

Search: (((incidental[Title/Abstract]) OR ("incidental findings"[MeSH Major Topic])) AND (((Brain[MeSH Terms]) OR (brain[Title/Abstract])) OR (head[Title/Abstract])) OR (cranial[Title/Abstract])) OR (neuro\*[Title/Abstract])) AND (((MRI[Title/Abstract]) OR (magnetic resonance[Title/Abstract])) OR ("magnetic resonance imaging"[MeSH Major Topic])) OR (((computed tomography[Title/Abstract]) OR (ct[Title/Abstract])) OR (computed tomography, x ray[MeSH Terms])) Sort by: **Most Recent**  
("incidental"[Title/Abstract] OR "incidental findings"[MeSH Major Topic]) AND ("brain"[MeSH Terms] OR "brain"[Title/Abstract] OR "head"[Title/Abstract] OR "cranial"[Title/Abstract] OR "neuro\*" [Title/Abstract]) AND ("MRI"[Title/Abstract] OR "magnetic resonance"[Title/Abstract] OR "magnetic resonance imaging"[MeSH Major Topic] OR ("computed tomography"[Title/Abstract] OR "ct"[Title/Abstract] OR "tomography, x ray computed"[MeSH Terms]))

### Translations

**Brain[MeSH Terms]:** "brain"[MeSH Terms]

**computed tomography, x ray[MeSH Terms]:** "tomography, x-ray computed"[MeSH Terms]

## SCOPUS – Inception to 24/05/2021 – 1,966 results

1. TITLE-ABS-KEY("incidental") (**52,804 results**)
2. TITLE-ABS-KEY("MRI") OR TITLE-ABS-KEY("magnetic resonance") OR TITLE-ABS-KEY(mr\*) (**2,453,606 results**)
3. TITLE-ABS-KEY("CT") OR TITLE-ABS-KEY("computed tomography") OR TITLE-ABS-KEY("computed tomographic") (**827,684 results**)
4. TITLE-ABS-KEY("head") OR TITLE-ABS-KEY("brain") OR TITLE-ABS-KEY("neuro\*") OR TITLE-ABS-KEY("cranial\*") (**5,055,724 results**)
5. #2 OR #3 (**3,104,347 results**)
6. #1 AND #4 AND #5 (**4,236 results**)
7. #6 AND (EXCLUDE(DOCTYPE, "cp")) (**4,169 results**)
8. #7 AND LIMIT-TO(EXACTKEYWORD, "Incidental Finding") (**1,966 results**)

## Supplementary Figure I

Forest plots depicting the findings of each study for each category.

### Aneurysm

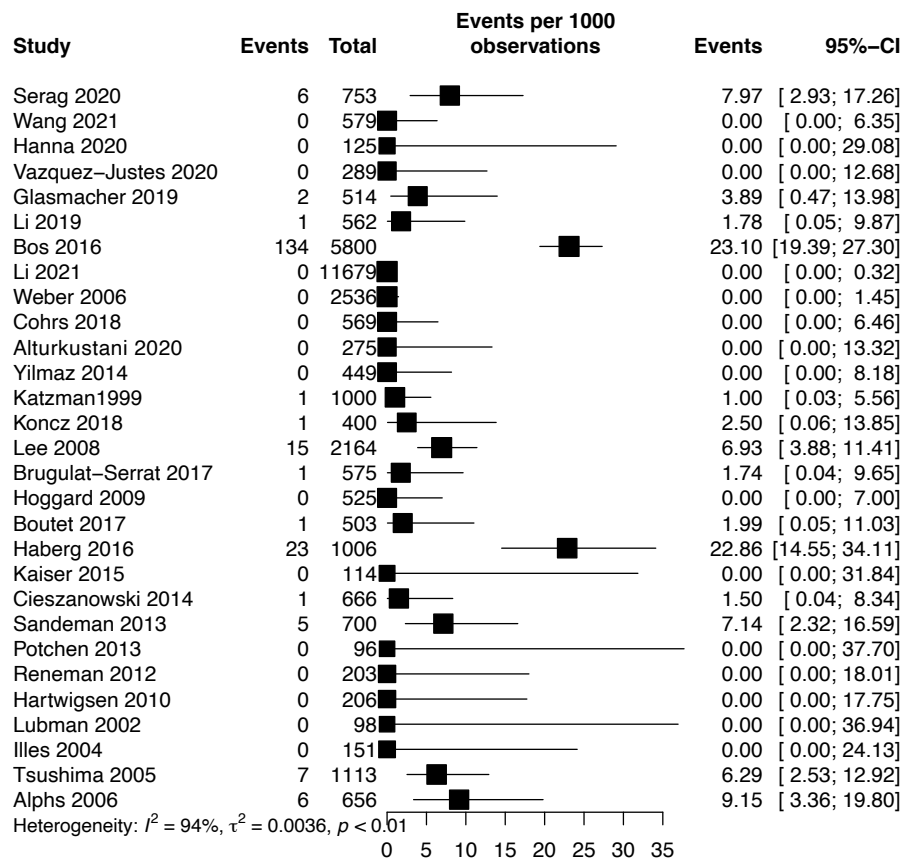

### Cavernoma

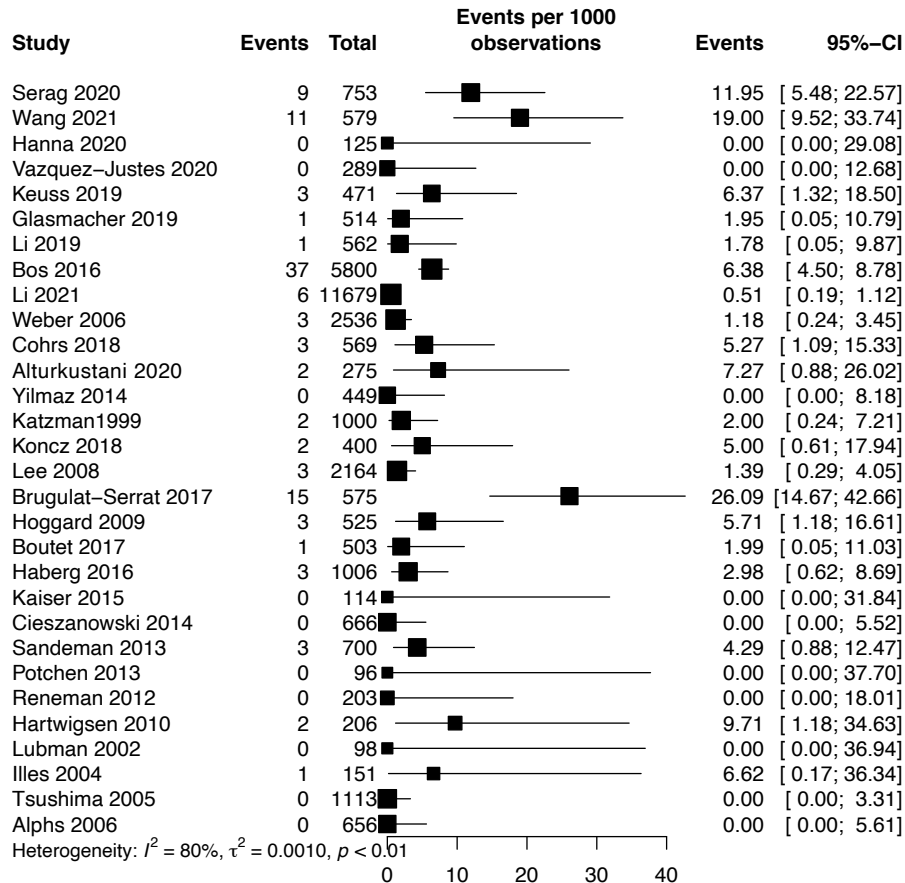

Other vascular

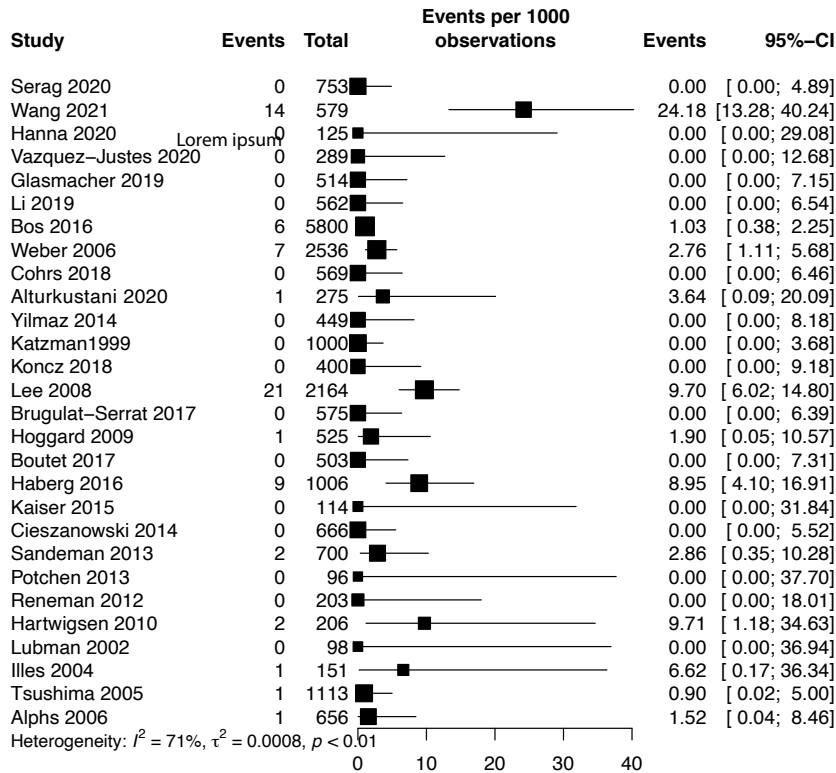

Any vascular

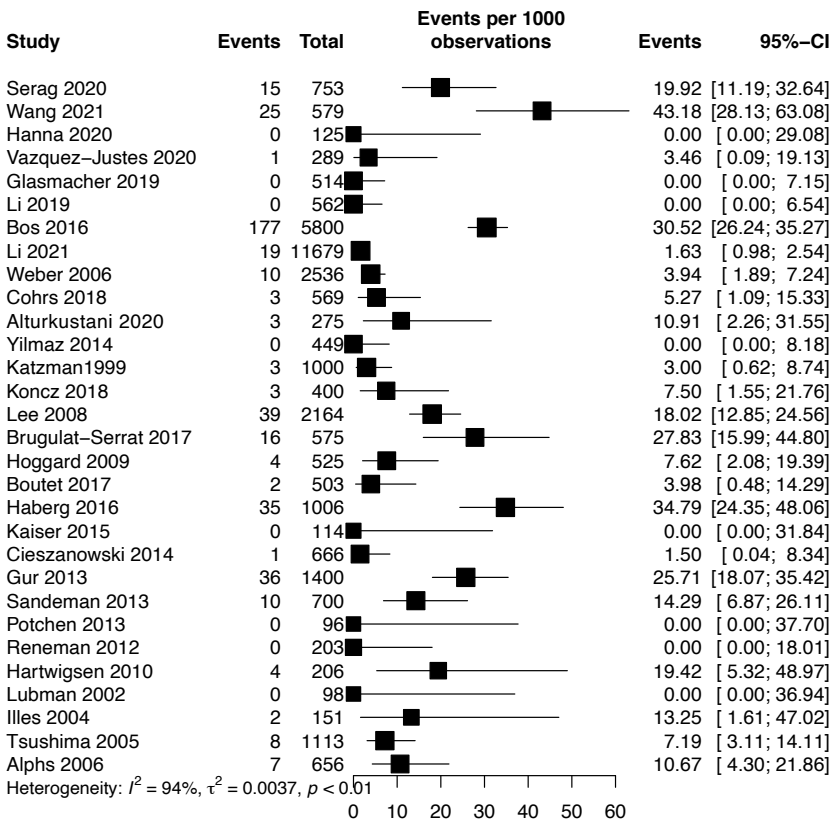

## Meningioma

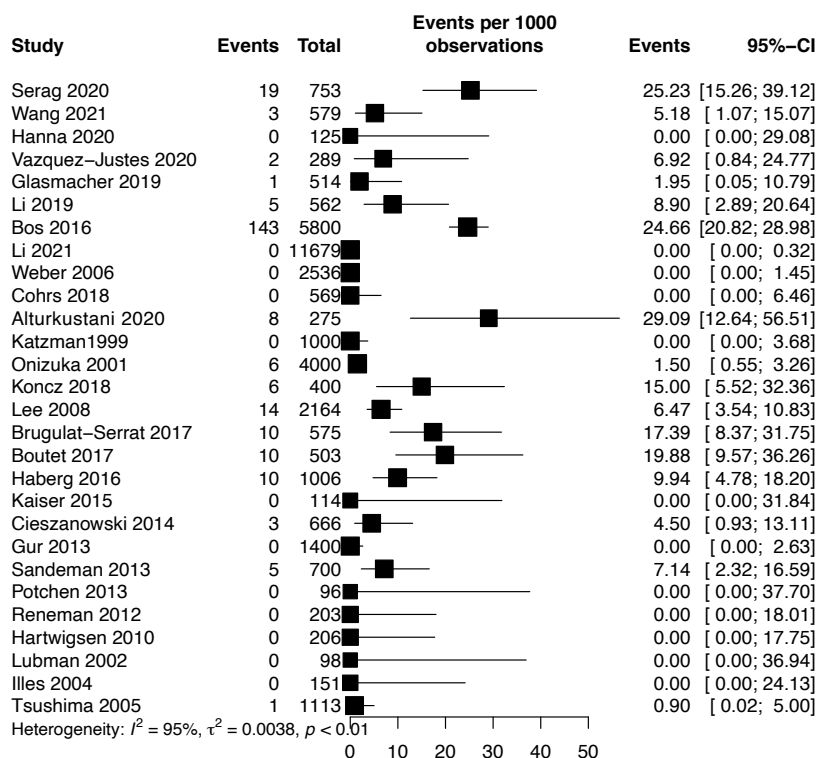

## Pituitary

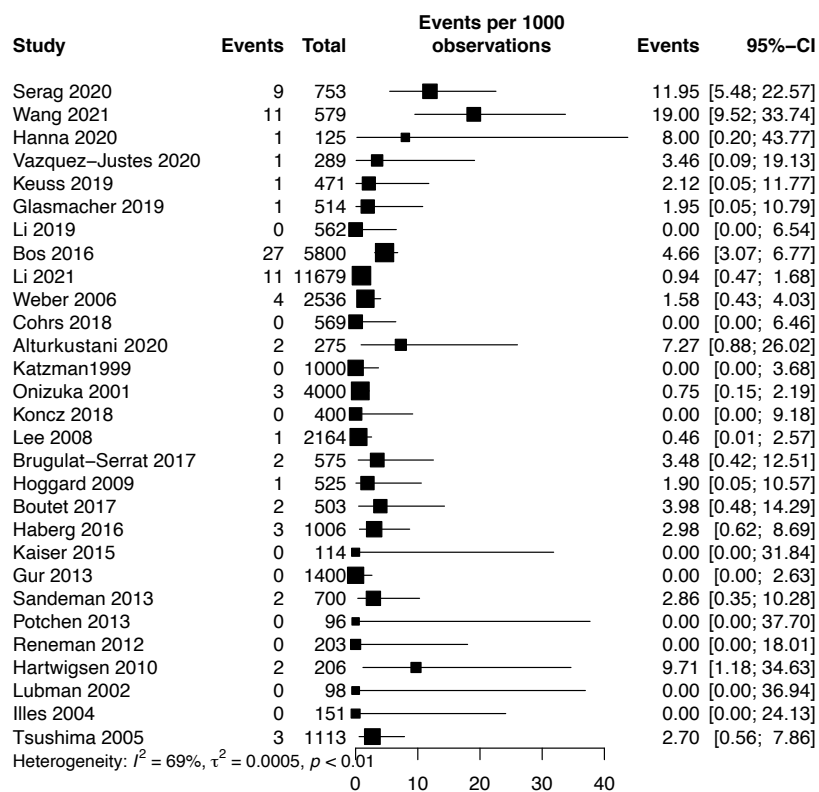

## Glioma

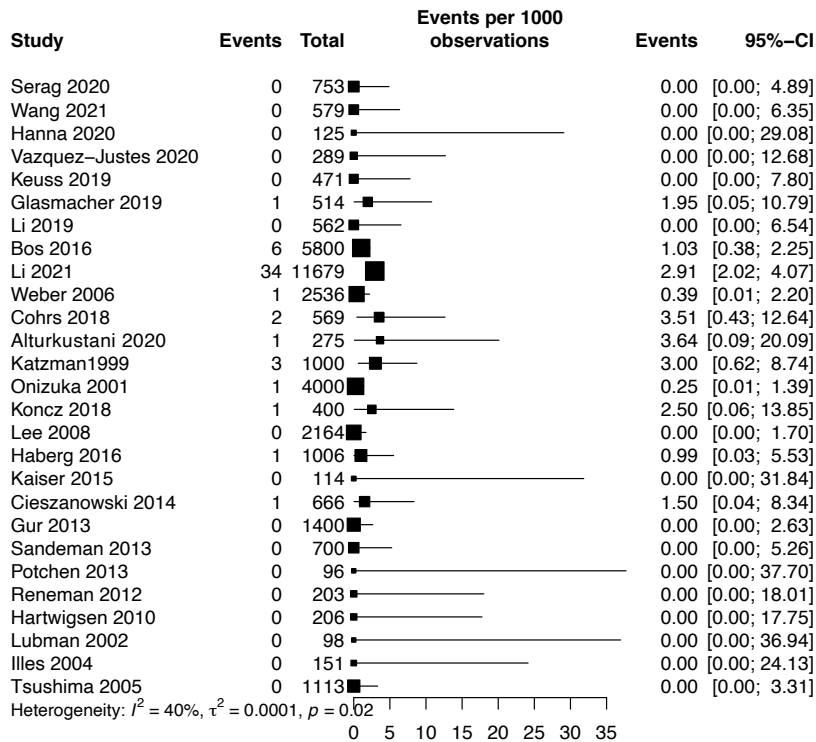

## Other neoplasm

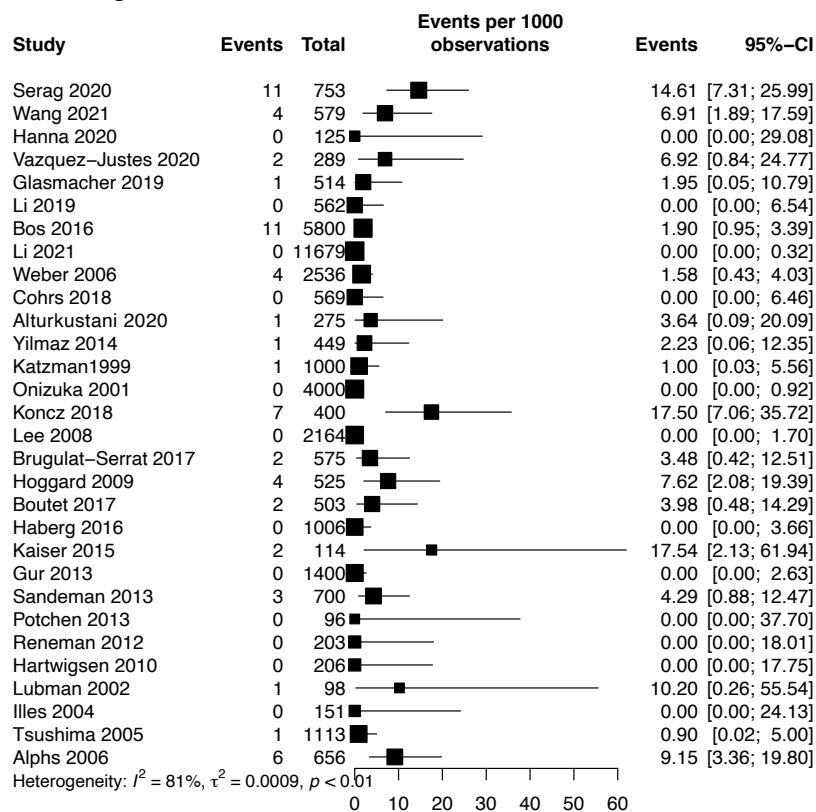



## Any neoplasm

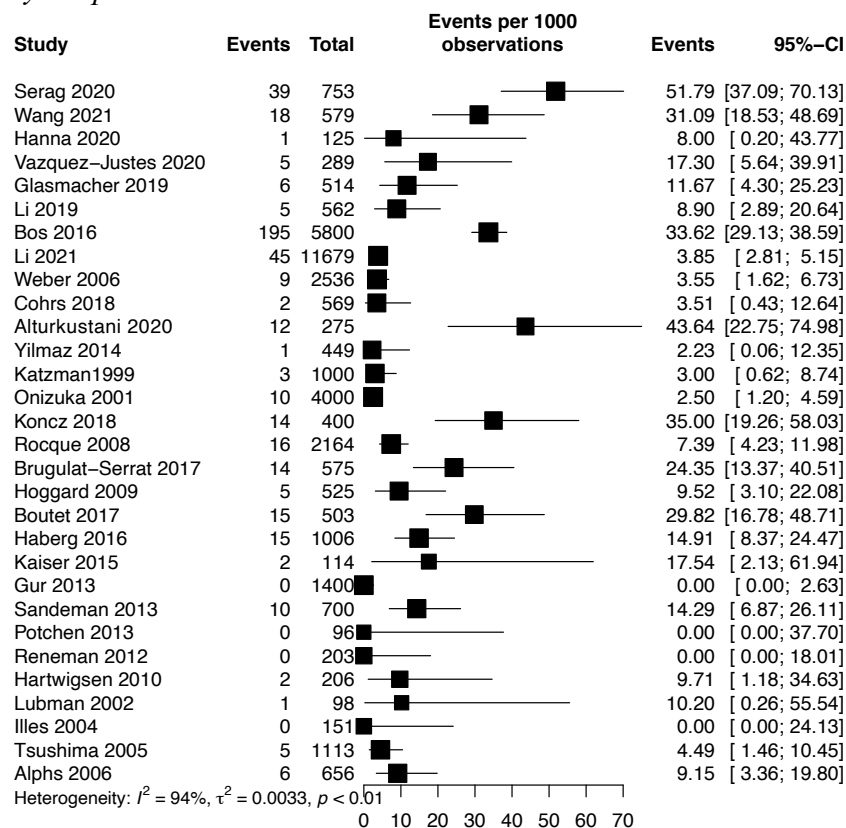

## Chiari malformation

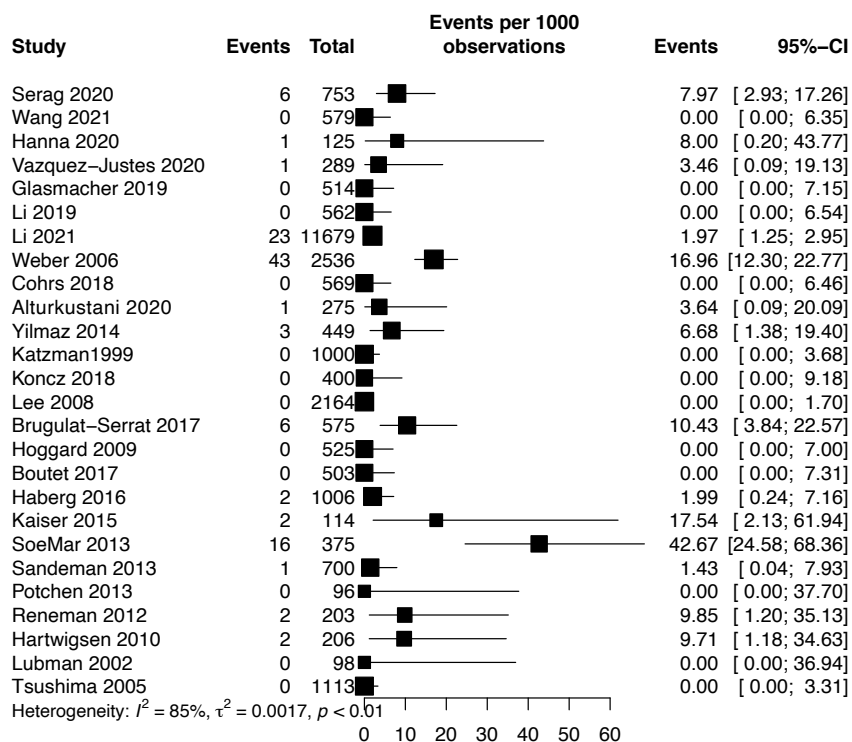

## Pineal cyst

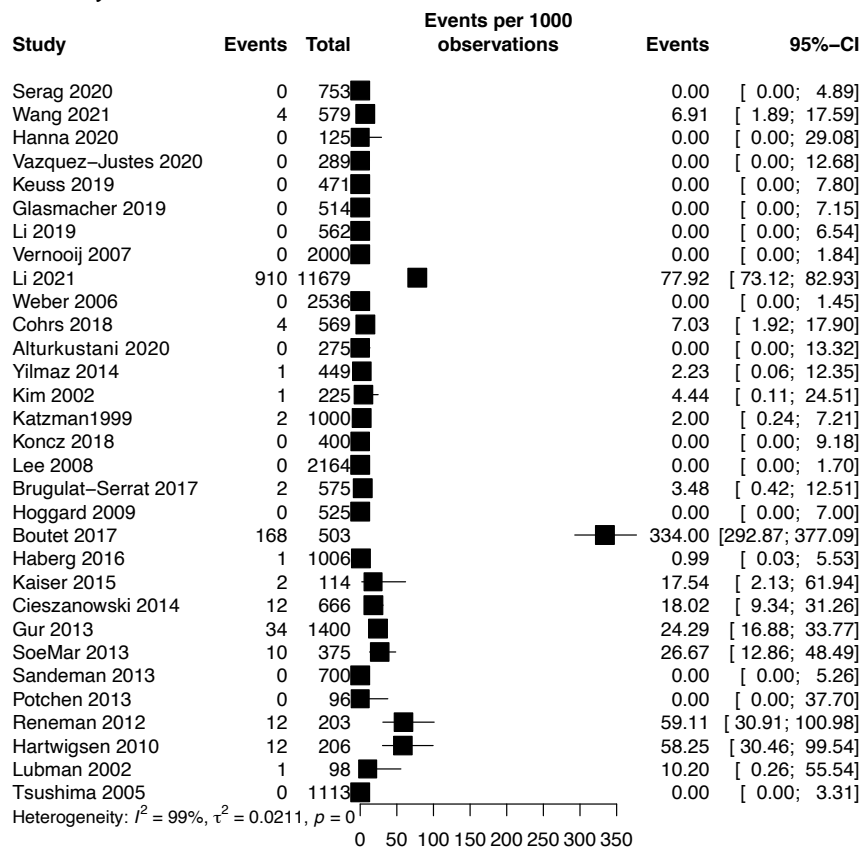

## Arachnoid cyst

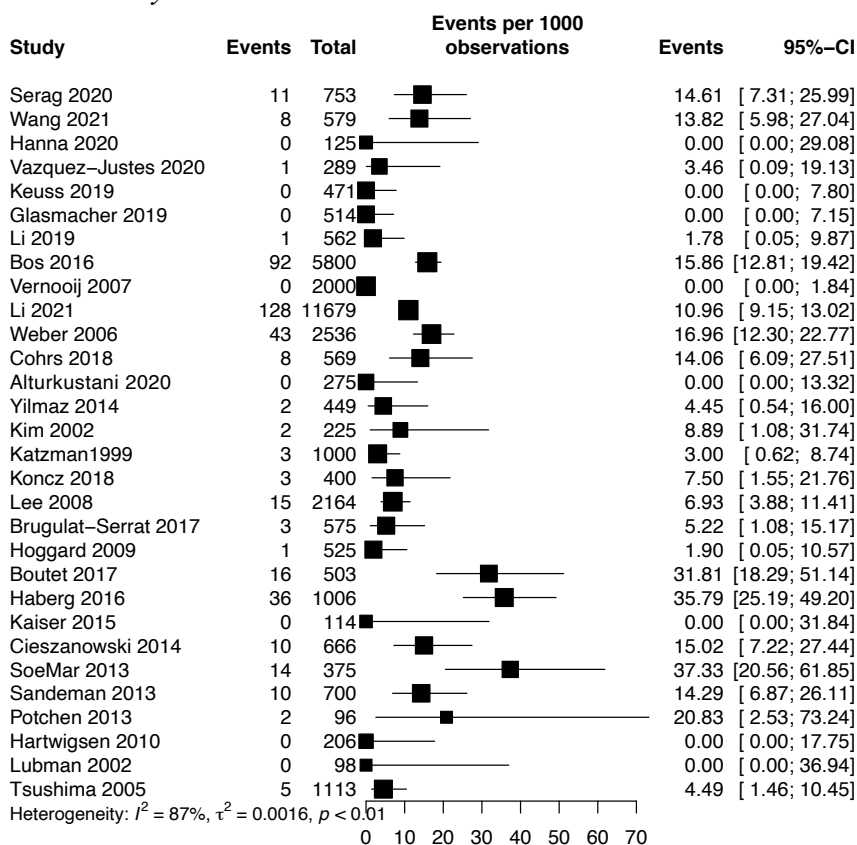

**Supplementary Table I**

Results of univariable meta-regressions for each analysis.

| Var  | Analysis            | Studies | N      | $\beta$   | 95%CI                  | R <sup>2</sup> | p-value |
|------|---------------------|---------|--------|-----------|------------------------|----------------|---------|
| Age  | Any neoplastic      | 30      | 39,040 | -0.000316 | (0.000701 - 0.00234)   | 36.72          | 0.079   |
| Male | Any neoplastic      | 30      | 39,040 | -0.018000 | (-0.221 - 0.0529)      | 2.16           | 0.53    |
| Age  | Any vascular        | 30      | 35,706 | 0.001680  | (8.02e-05 - 0.00189)   | 12.84          | <0.001  |
| Male | Any vascular        | 30      | 35,706 | -0.140000 | (-0.17 - 0.0935)       | 0.00           | 0.059   |
| Age  | Aneurysm            | 29      | 34,306 | 0.000499  | (0.000531 - 0.00184)   | 38.93          | 0.12    |
| Male | Aneurysm            | 29      | 34,306 | 0.020900  | (-0.114 - 0.0924)      | 0.00           | 0.65    |
| Age  | Arachnoid cyst      | 30      | 36,367 | 0.000232  | (-0.000995 - 0.000706) | 0.00           | 0.53    |
| Male | Arachnoid cyst      | 30      | 36,367 | -0.010100 | (-0.135 - 0.157)       | 0.00           | 0.82    |
| Age  | Cavernoma           | 30      | 34,777 | -0.000610 | (-0.000122 - 0.00118)  | 10.20          | 0.55    |
| Male | Cavernoma           | 30      | 34,777 | -0.262000 | (-0.174 - -0.0102)     | 19.03          | 0.14    |
| Age  | Chiari malformation | 26      | 27,408 | -0.000561 | (-0.00184 - -0.00019)  | 18.30          | 0.032   |
| Male | Chiari malformation | 26      | 27,408 | -0.050300 | (-0.152 - 0.145)       | 0.00           | 0.28    |
| Age  | Glioma              | 27      | 37,469 | -0.000316 | (-0.000669 - 3.7e-05)  | 25.62          | 0.079   |
| Male | Glioma              | 27      | 37,469 | -0.018000 | (-0.0746 - 0.0386)     | 0.00           | 0.53    |
| Age  | Meningioma          | 28      | 38,076 | 0.001680  | (0.000961 - 0.0024)    | 51.64          | <0.001  |
| Male | Meningioma          | 28      | 38,076 | -0.140000 | (-0.286 - 0.00513)     | 11.77          | 0.059   |
| Age  | Other neoplastic    | 30      | 39,040 | 0.000499  | (-0.000136 - 0.00113)  | 10.39          | 0.12    |
| Male | Other neoplastic    | 30      | 39,040 | 0.020900  | (-0.0705 - 0.112)      | 0.00           | 0.65    |
| Age  | Other vascular      | 28      | 22,627 | 0.000232  | (-0.00049 - 0.000954)  | 0.00           | 0.53    |
| Male | Other vascular      | 28      | 22,627 | -0.010100 | (-0.0963 - 0.0761)     | 0.00           | 0.82    |
| Age  | Pineal cyst         | 31      | 32,170 | -0.000610 | (-0.0026 - 0.00138)    | 0.00           | 0.55    |
| Male | Pineal cyst         | 31      | 32,170 | -0.262000 | (-0.612 - 0.0879)      | 3.91           | 0.14    |
| Age  | Pituitary           | 29      | 38,406 | 0.000561  | (4.95e-05 - 0.00107)   | 26.38          | 0.032   |
| Male | Pituitary           | 29      | 38,406 | -0.050300 | (-0.141 - 0.0407)      | 0.00           | 0.28    |

**Supplementary Table II**

Results of multivariable meta-regressions for each analysis.

| Var  | Analysis            | Studies | N      | $\beta$   | 95%CI                   | R <sup>2</sup> | p-value |
|------|---------------------|---------|--------|-----------|-------------------------|----------------|---------|
| Age  | Any neoplastic      | 30      | 39,040 | 0.001500  | (0.000692 - 0.00231)    | 38.22          | <0.001  |
| Male | Any neoplastic      | 30      | 39,040 | -0.078400 | (-0.191 - 0.0338)       |                | 0.17    |
| Age  | Any vascular        | 30      | 35,706 | 0.000983  | (7.03e-05 - 0.0019)     | 11.03          | 0.035   |
| Male | Any vascular        | 30      | 35,706 | -0.039100 | (-0.163 - 0.0853)       |                | 0.54    |
| Age  | Aneurysm            | 29      | 34,306 | 0.001180  | (0.000509 - 0.00185)    | 35.96          | <0.001  |
| Male | Aneurysm            | 29      | 34,306 | -0.004390 | (-0.0898 - 0.0811)      |                | 0.92    |
| Age  | Arachnoid cyst      | 30      | 36,367 | -0.000140 | (-0.00101 - 0.000731)   | 0.00           | 0.75    |
| Male | Arachnoid cyst      | 30      | 36,367 | 0.008380  | (-0.141 - 0.157)        |                | 0.91    |
| Age  | Cavernoma           | 30      | 34,777 | 0.000470  | (-0.000142 - 0.00108)   | 25.42          | 0.13    |
| Male | Cavernoma           | 30      | 34,777 | -0.085900 | (-0.166 - -0.00623)     |                | 0.035   |
| Age  | Chiari malformation | 26      | 27,408 | -0.001030 | (-0.00188 - -0.000179)  | 12.87          | 0.018   |
| Male | Chiari malformation | 26      | 27,408 | -0.017000 | (-0.154 - 0.12)         |                | 0.81    |
| Age  | Glioma              | 27      | 37,469 | -0.000378 | (-0.000715 - -3.99e-05) | 45.24          | 0.028   |
| Male | Glioma              | 27      | 37,469 | -0.033000 | (-0.083 - 0.0169)       |                | 0.19    |
| Age  | Meningioma          | 28      | 38,076 | 0.001560  | (0.000838 - 0.00228)    | 54.23          | <0.001  |
| Male | Meningioma          | 28      | 38,076 | -0.091600 | (-0.204 - 0.021)        |                | 0.11    |
| Age  | Other neoplastic    | 30      | 39,040 | 0.000509  | (-0.000132 - 0.00115)   | 8.49           | 0.12    |
| Male | Other neoplastic    | 30      | 39,040 | 0.025800  | (-0.0615 - 0.113)       |                | 0.56    |
| Age  | Other vascular      | 28      | 22,627 | 0.000222  | (-0.000521 - 0.000966)  | 0.00           | 0.56    |
| Male | Other vascular      | 28      | 22,627 | -0.006650 | (-0.0945 - 0.0812)      |                | 0.88    |
| Age  | Pineal cyst         | 31      | 32,170 | -0.000603 | (-0.00255 - 0.00135)    | 1.82           | 0.54    |
| Male | Pineal cyst         | 31      | 32,170 | -0.261000 | (-0.615 - 0.0922)       |                | 0.15    |
| Age  | Pituitary           | 29      | 38,406 | 0.000511  | (-3.79e-05 - 0.00106)   | 17.99          | 0.068   |
| Male | Pituitary           | 29      | 38,406 | -0.027100 | (-0.114 - 0.0597)       |                | 0.54    |

## Supplementary Figure II

Relationship between proportions for each finding and age in each analysis, containing studies in healthy volunteers only. Points represent the findings of the individual studies, with size of the point proportional to the sample size of the study. The black line represents the fitted restricted cubic spline model, and the shaded area its 95% confidence interval.

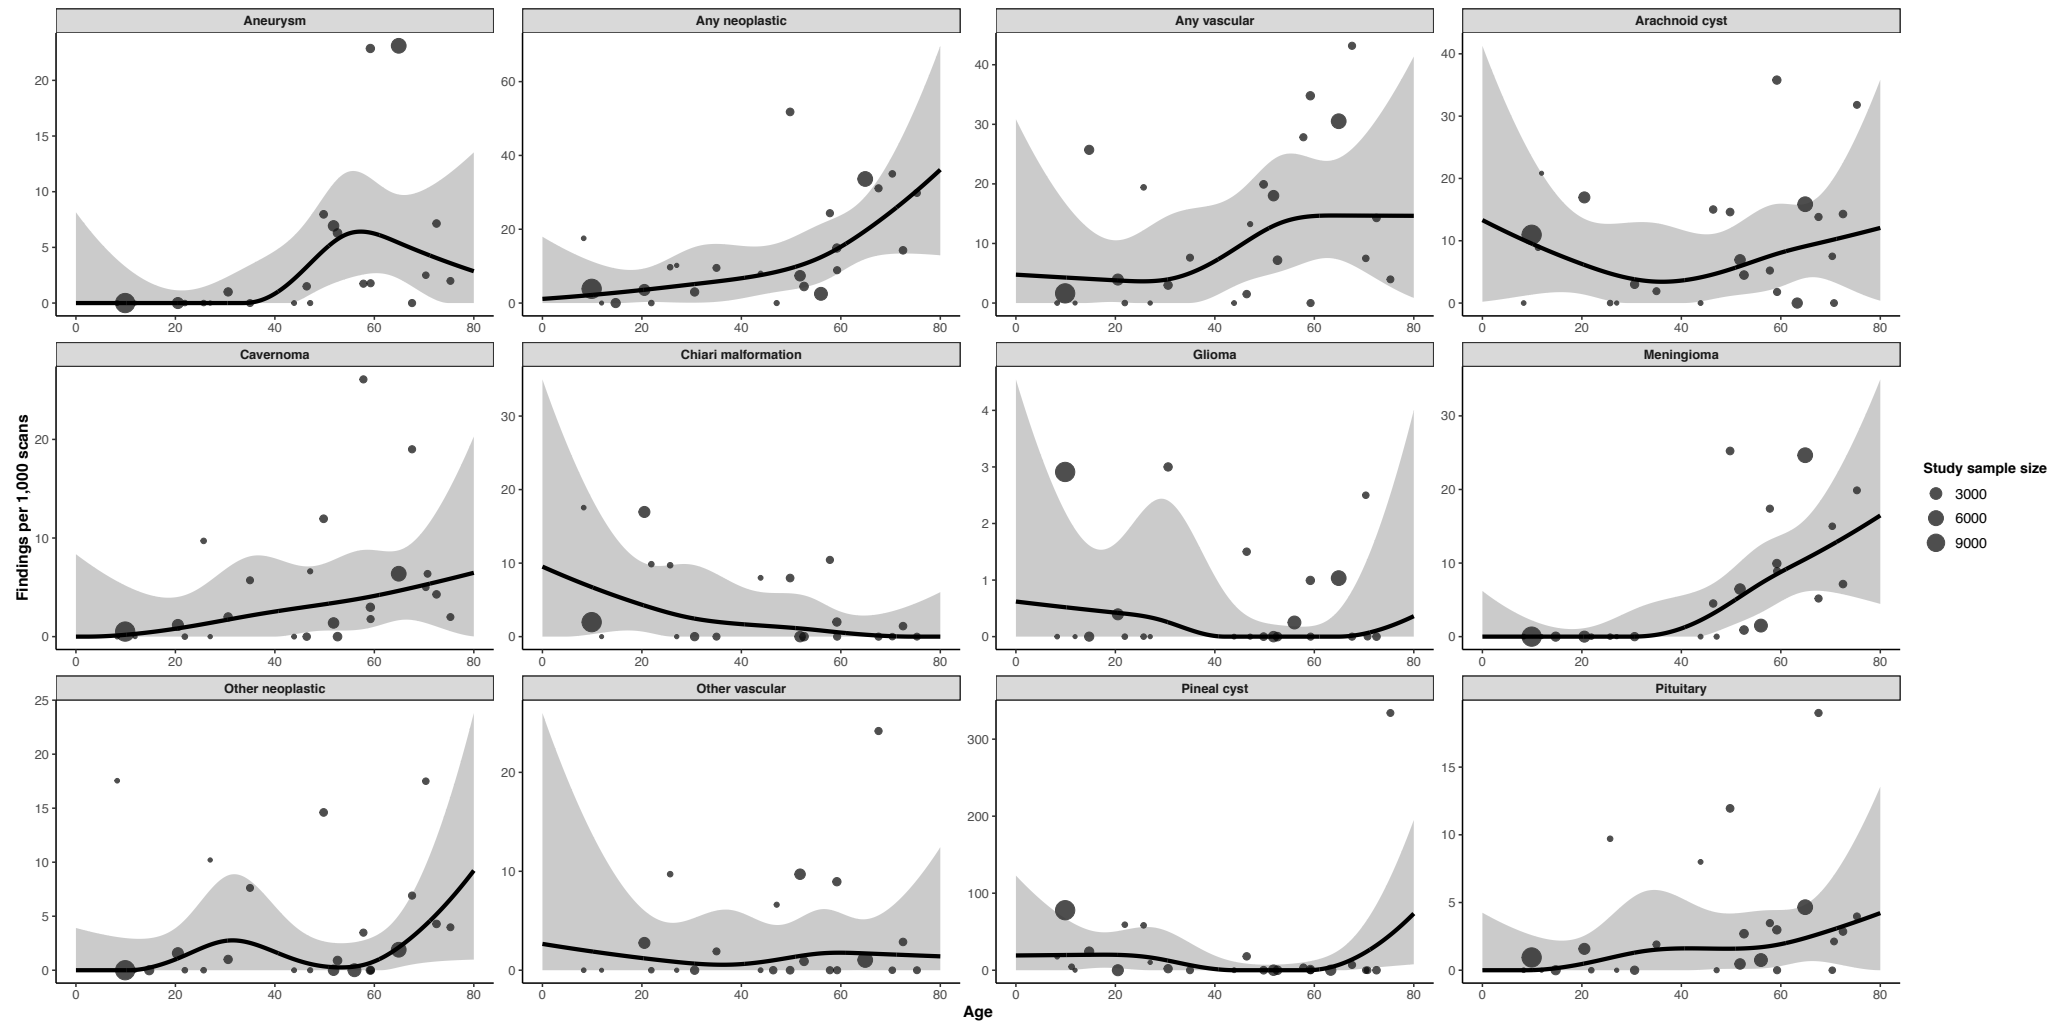

### Supplementary Table III

Age-stratified estimates of proportions for each finding from restricted cubic spline models, limited to studies in healthy volunteers only.

| Finding                 | Age - Findings /1,000 scans (95%CI) |                |                  |              |                |               |             |              |              |               |
|-------------------------|-------------------------------------|----------------|------------------|--------------|----------------|---------------|-------------|--------------|--------------|---------------|
|                         | 1                                   | 5              | 10               | 20           | 30             | 40            | 50          | 60           | 70           | 80            |
| Vascular                |                                     |                |                  |              |                |               |             |              |              |               |
| <i>Aneurysm</i>         | 0 (0 - 8)                           | 0 (0 - 5)      | 0 (0 - 3)        | 0 (0 - 1)    | 0 (0 - 2)      | 0.8 (0 - 5)   | 5 (1 - 10)  | 6 (3 - 11)   | 4 (0.8 - 10) | 3 (0 - 14)    |
| <i>Cavernoma</i>        | 0 (0 - 8)                           | 0.03 (0 - 7)   | 0.2 (0 - 5)      | 0.8 (0 - 4)  | 2 (0 - 7)      | 3 (0.001 - 8) | 3 (0.6 - 7) | 4 (1 - 9)    | 5 (1 - 11)   | 6 (0.02 - 20) |
| <i>Other vascular</i>   | 3 (0 - 25)                          | 2 (0 - 19)     | 2 (0 - 14)       | 1 (0 - 6)    | 0.7 (0 - 5)    | 0.6 (0 - 6)   | 1 (0 - 5)   | 2 (0 - 6)    | 2 (0 - 6)    | 1 (0 - 12)    |
| <i>Any vascular</i>     | 5 (0 - 29)                          | 5 (0 - 23)     | 4 (0 - 17)       | 4 (0.2 - 11) | 4 (0 - 14)     | 7 (1 - 17)    | 12 (5 - 23) | 15 (7 - 24)  | 15 (5 - 28)  | 15 (0.9 - 41) |
| Neoplastic              |                                     |                |                  |              |                |               |             |              |              |               |
| <i>Meningioma</i>       | 0 (0 - 6)                           | 0 (0 - 4)      | 0 (0 - 2)        | 0 (0 - 1)    | 0.0009 (0 - 4) | 1 (0 - 6)     | 5 (1 - 9)   | 9 (5 - 14)   | 12 (6 - 21)  | 16 (4 - 35)   |
| <i>Pituitary</i>        | 0 (0 - 4)                           | 0 (0 - 3)      | 0.007 (0 - 3)    | 0.5 (0 - 2)  | 1 (0 - 5)      | 2 (0 - 5)     | 2 (0.1 - 4) | 2 (0.3 - 4)  | 3 (0.5 - 7)  | 4 (0 - 14)    |
| <i>Glioma</i>           | 0.6 (0 - 4)                         | 0.6 (0 - 3)    | 0.5 (0 - 2)      | 0.4 (0 - 2)  | 0.3 (0 - 2)    | 0.01 (0 - 1)  | 0 (0 - 0.2) | 0 (0 - 0.2)  | 0.05 (0 - 1) | 0.4 (0 - 4)   |
| <i>Other neoplastic</i> | 0 (0 - 4)                           | 0 (0 - 3)      | 0 (0 - 3)        | 1 (0 - 4)    | 3 (0 - 9)      | 2 (0 - 6)     | 0.4 (0 - 3) | 0.8 (0 - 3)  | 4 (0.7 - 9)  | 9 (1 - 24)    |
| <i>Any neoplastic</i>   | 1 (0 - 17)                          | 2 (0 - 14)     | 2 (0 - 11)       | 4 (0.3 - 9)  | 5 (0.09 - 15)  | 7 (1 - 16)    | 9 (4 - 18)  | 15 (8 - 24)  | 25 (13 - 39) | 36 (13 - 70)  |
| Chiari malformation     | 9 (0 - 33)                          | 8 (0.003 - 26) | 7 (0.3 - 19)     | 4 (0.7 - 10) | 3 (0 - 10)     | 2 (0 - 7)     | 1 (0 - 6)   | 0.6 (0 - 3)  | 0.07 (0 - 3) | 0 (0 - 6)     |
| Pineal cyst             | 19 (0 - 116)                        | 19 (0 - 92)    | 20 (0.0007 - 67) | 20 (3 - 50)  | 13 (0 - 52)    | 2 (0 - 19)    | 0 (0 - 7)   | 0.4 (0 - 13) | 22 (2 - 60)  | 74 (8 - 195)  |
| Arachnoid cyst          | 13 (0.3 - 39)                       | 11 (0.7 - 31)  | 10 (1 - 23)      | 6 (1 - 14)   | 4 (0 - 13)     | 4 (0 - 12)    | 5 (1 - 12)  | 8 (3 - 16)   | 10 (4 - 19)  | 12 (0.4 - 36) |

### Supplementary Figure III

Relationship between age and proportion of findings derived from conventional linear regression models.

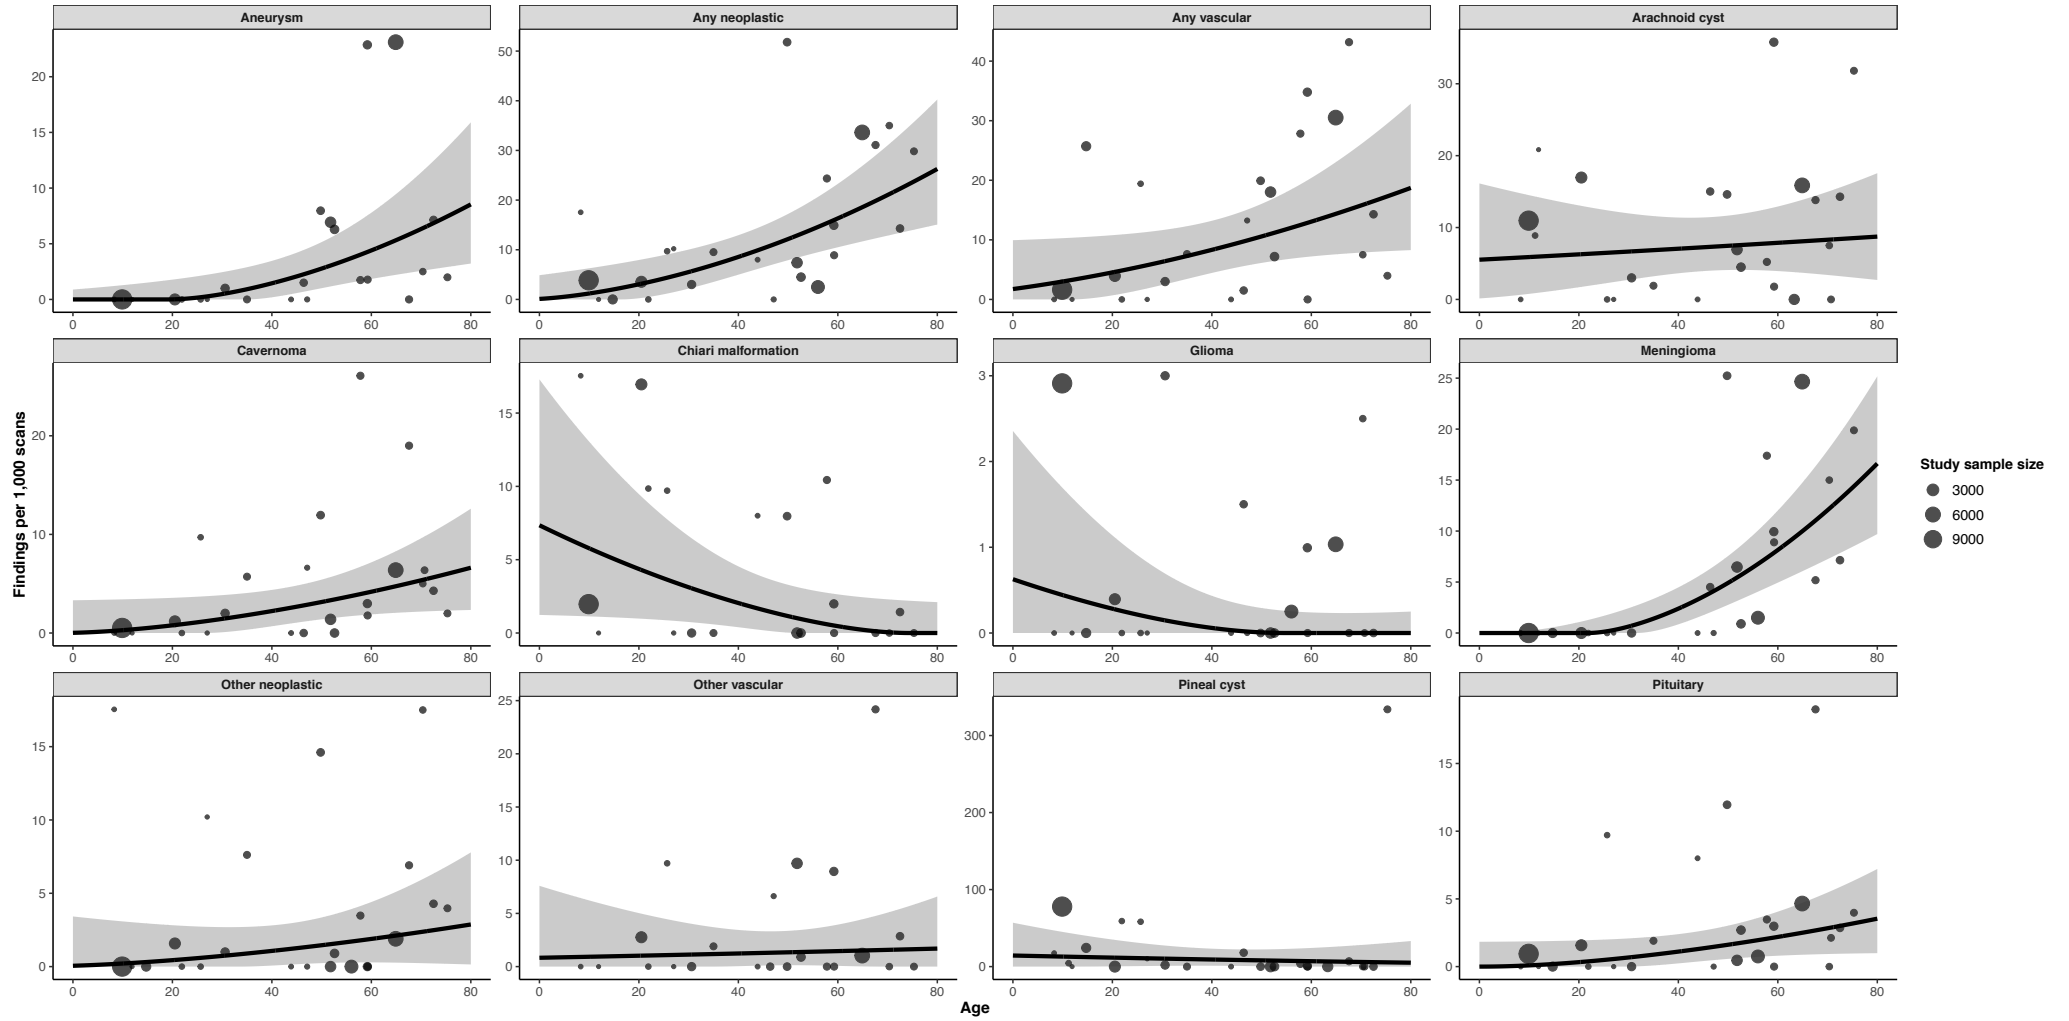

### Supplementary Table IV

Age-stratified estimates of proportions, derived from univariable linear regression models.

| Finding                 | Age - Findings /1,000 scans (95%CI) |              |              |               |                 |                |                 |              |              |              |
|-------------------------|-------------------------------------|--------------|--------------|---------------|-----------------|----------------|-----------------|--------------|--------------|--------------|
|                         | 1                                   | 5            | 10           | 20            | 30              | 40             | 50              | 60           | 70           | 80           |
| Vascular                |                                     |              |              |               |                 |                |                 |              |              |              |
| <i>Aneurysm</i>         | 0 (0 - 0.9)                         | 0 (0 - 1)    | 0 (0 - 1)    | 0.005 (0 - 2) | 0.5 (0 - 2)     | 1 (0.2 - 3)    | 3 (1 - 5)       | 4 (2 - 8)    | 6 (3 - 11)   | 9 (3 - 16)   |
| <i>Cavernoma</i>        | 0.03 (0 - 3)                        | 0.1 (0 - 3)  | 0.3 (0 - 3)  | 0.8 (0 - 4)   | 1 (0.07 - 4)    | 2 (0.7 - 4)    | 3 (1 - 5)       | 4 (2 - 7)    | 5 (2 - 10)   | 7 (2 - 13)   |
| <i>Other vascular</i>   | 0.8 (0 - 7)                         | 0.9 (0 - 7)  | 0.9 (0 - 6)  | 1 (0 - 5)     | 1 (0 - 4)       | 1 (0.04 - 3)   | 1 (0.1 - 3)     | 1 (0.07 - 4) | 2 (0 - 5)    | 2 (0 - 7)    |
| <i>Any vascular</i>     | 2 (0 - 10)                          | 2 (0 - 10)   | 3 (0 - 10)   | 5 (0.7 - 11)  | 6 (2 - 12)      | 8 (4 - 13)     | 11 (6 - 16)     | 13 (7 - 20)  | 16 (8 - 26)  | 19 (8 - 33)  |
| Neoplastic              |                                     |              |              |               |                 |                |                 |              |              |              |
| <i>Meningioma</i>       | 0 (0 - 0)                           | 0 (0 - 0.02) | 0 (0 - 0.2)  | 0 (0 - 1)     | 0.6 (0 - 2)     | 2 (0.8 - 4)    | 5 (3 - 8)       | 8 (5 - 12)   | 12 (7 - 18)  | 17 (10 - 25) |
| <i>Pituitary</i>        | 0.0004 (0 - 2)                      | 0.02 (0 - 2) | 0.09 (0 - 2) | 0.3 (0 - 2)   | 0.7 (0.002 - 2) | 1 (0.2 - 2)    | 2 (0.6 - 3)     | 2 (0.8 - 4)  | 3 (0.9 - 5)  | 4 (1 - 7)    |
| <i>Glioma</i>           | 0.6 (0 - 2)                         | 0.5 (0 - 2)  | 0.4 (0 - 2)  | 0.3 (0 - 1)   | 0.2 (0 - 0.7)   | 0.06 (0 - 0.4) | 0.007 (0 - 0.3) | 0 (0 - 0.2)  | 0 (0 - 0.2)  | 0 (0 - 0.3)  |
| <i>Other neoplastic</i> | 0.07 (0 - 3)                        | 0.1 (0 - 3)  | 0.2 (0 - 3)  | 0.4 (0 - 3)   | 0.7 (0 - 3)     | 1 (0.07 - 3)   | 1 (0.2 - 3)     | 2 (0.3 - 4)  | 2 (0.2 - 6)  | 3 (0.1 - 8)  |
| <i>Any neoplastic</i>   | 0.2 (0 - 5)                         | 0.5 (0 - 6)  | 1 (0 - 6)    | 3 (0.2 - 8)   | 6 (2 - 10)      | 9 (5 - 13)     | 12 (8 - 17)     | 16 (11 - 23) | 21 (13 - 31) | 26 (15 - 40) |
| Chiari malformation     | 7 (1 - 17)                          | 7 (1 - 15)   | 6 (1 - 13)   | 4 (1 - 9)     | 3 (0.8 - 7)     | 2 (0.4 - 5)    | 1 (0.03 - 3)    | 0.5 (0 - 3)  | 0.05 (0 - 2) | 0 (0 - 2)    |
| Pineal cyst             | 14 (0 - 56)                         | 14 (0 - 51)  | 13 (0 - 45)  | 12 (0.3 - 35) | 10 (0.9 - 28)   | 9 (1 - 23)     | 8 (0.5 - 22)    | 7 (0 - 24)   | 6 (0 - 28)   | 5 (0 - 33)   |
| Arachnoid cyst          | 6 (0.2 - 16)                        | 6 (0.4 - 15) | 6 (0.8 - 14) | 6 (2 - 13)    | 7 (3 - 12)      | 7 (4 - 11)     | 7 (4 - 12)      | 8 (4 - 13)   | 8 (3 - 15)   | 9 (3 - 18)   |



## Supplementary Figure IV

Relationship between age and proportions for each finding, derived from linear regression models adjusted for both age and gender. Models are fitted with gender proportion held at an equal number of males and females.

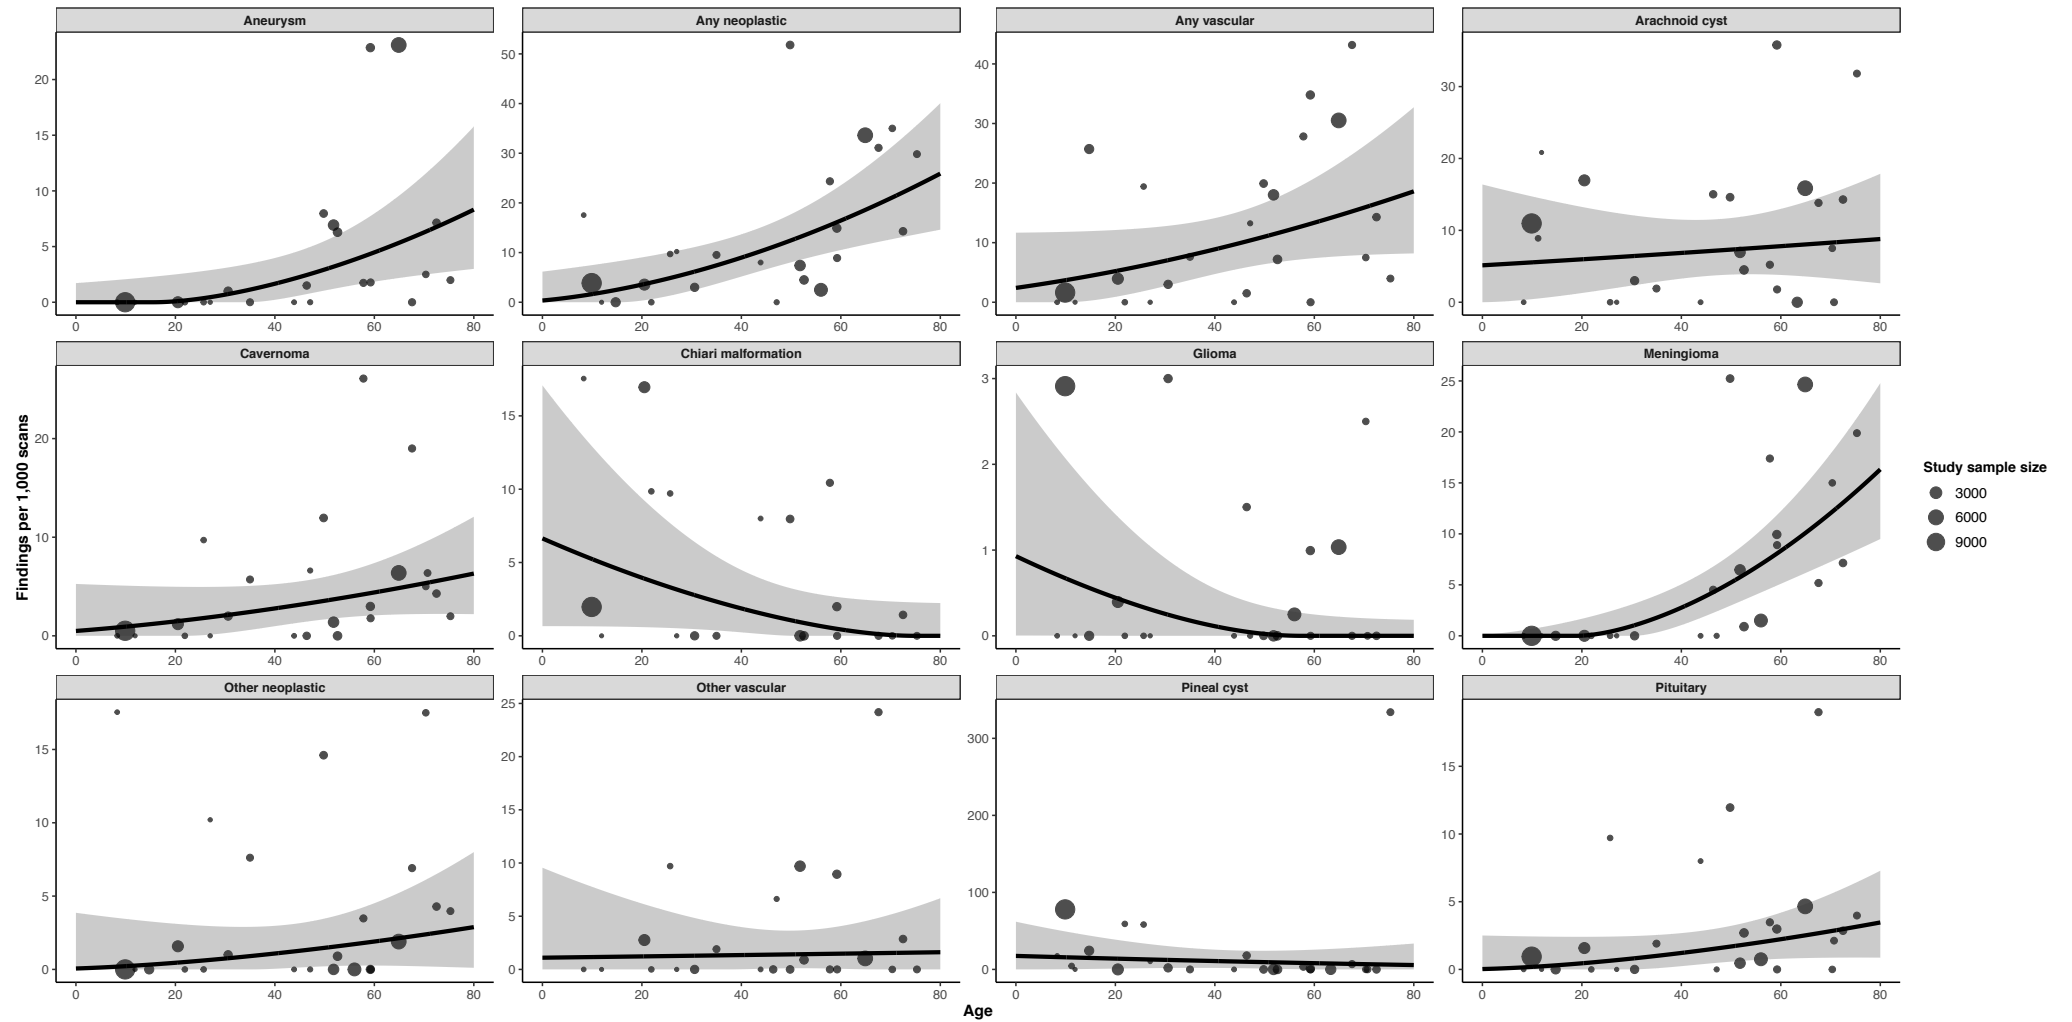

### Supplementary Table V

Age-stratified estimates of proportions for each finding, derived from multivariable linear regression models adjusted for age and gender proportion. Estimates are derived from predictions assuming each and an equal distribution of males and females.

| Finding                 | Age - Findings /1,000 scans (95%CI) |                 |                 |                  |                 |               |                |               |              |              |
|-------------------------|-------------------------------------|-----------------|-----------------|------------------|-----------------|---------------|----------------|---------------|--------------|--------------|
|                         | 1                                   | 5               | 10              | 20               | 30              | 40            | 50             | 60            | 70           | 80           |
| Vascular                |                                     |                 |                 |                  |                 |               |                |               |              |              |
| <i>Aneurysm</i>         | 0 (0 - 2)                           | 0 (0 - 2)       | 0 (0 - 2)       | 0.08 (0 - 3)     | 0.7 (0 - 3)     | 2 (0.2 - 4)   | 3 (1 - 5)      | 4 (2 - 8)     | 6 (2 - 11)   | 8 (3 - 16)   |
| <i>Cavernoma</i>        | 0.5 (0 - 5)                         | 0.7 (0 - 5)     | 0.9 (0 - 5)     | 1 (0 - 5)        | 2 (0.3 - 5)     | 3 (1 - 5)     | 4 (2 - 6)      | 4 (2 - 7)     | 5 (2 - 9)    | 6 (2 - 12)   |
| <i>Other vascular</i>   | 1 (0 - 9)                           | 1 (0 - 9)       | 1 (0 - 8)       | 1 (0 - 6)        | 1 (0 - 5)       | 1 (0.01 - 4)  | 1 (0.1 - 4)    | 1 (0.06 - 4)  | 2 (0 - 5)    | 2 (0 - 7)    |
| <i>Any vascular</i>     | 3 (0 - 12)                          | 3 (0 - 12)      | 4 (0 - 12)      | 5 (0.9 - 12)     | 7 (3 - 13)      | 9 (5 - 14)    | 11 (6 - 17)    | 13 (7 - 21)   | 16 (8 - 26)  | 19 (8 - 33)  |
| Neoplastic              |                                     |                 |                 |                  |                 |               |                |               |              |              |
| <i>Meningioma</i>       | 0 (0 - 0.1)                         | 0 (0 - 0.3)     | 0 (0 - 0.7)     | 0.02 (0 - 2)     | 1 (0 - 3)       | 3 (1 - 5)     | 5 (3 - 8)      | 8 (5 - 12)    | 12 (7 - 18)  | 16 (9 - 25)  |
| <i>Pituitary</i>        | 0.04 (0 - 2)                        | 0.09 (0 - 2)    | 0.2 (0 - 2)     | 0.5 (0 - 2)      | 0.8 (0.002 - 2) | 1 (0.2 - 3)   | 2 (0.6 - 3)    | 2 (0.8 - 4)   | 3 (0.9 - 6)  | 3 (0.9 - 7)  |
| <i>Glioma</i>           | 0.9 (0.003 - 3)                     | 0.8 (0.003 - 2) | 0.7 (0.002 - 2) | 0.4 (0.0004 - 1) | 0.3 (0 - 0.9)   | 0.1 (0 - 0.6) | 0.02 (0 - 0.3) | 0 (0 - 0.2)   | 0 (0 - 0.2)  | 0 (0 - 0.2)  |
| <i>Other neoplastic</i> | 0.07 (0 - 4)                        | 0.1 (0 - 4)     | 0.2 (0 - 3)     | 0.5 (0 - 3)      | 0.7 (0 - 3)     | 1 (0.04 - 3)  | 1 (0.2 - 3)    | 2 (0.3 - 5)   | 2 (0.2 - 6)  | 3 (0.1 - 8)  |
| <i>Any neoplastic</i>   | 0.4 (0 - 6)                         | 0.9 (0 - 7)     | 2 (0 - 7)       | 4 (0.3 - 9)      | 6 (2 - 11)      | 9 (5 - 14)    | 12 (8 - 18)    | 16 (11 - 24)  | 21 (13 - 31) | 26 (15 - 40) |
| Chiari malformation     | 6 (0.7 - 17)                        | 6 (0.7 - 15)    | 5 (0.6 - 13)    | 4 (0.6 - 9)      | 3 (0.5 - 7)     | 2 (0.2 - 4)   | 1 (0.003 - 3)  | 0.4 (0 - 3)   | 0.06 (0 - 2) | 0 (0 - 2)    |
| Pineal cyst             | 17 (0 - 61)                         | 17 (0.01 - 55)  | 16 (0.2 - 49)   | 14 (1 - 39)      | 12 (2 - 31)     | 11 (2 - 26)   | 9 (1 - 24)     | 8 (0.03 - 26) | 7 (0 - 29)   | 6 (0 - 34)   |
| Arachnoid cyst          | 5 (0.01 - 16)                       | 5 (0.1 - 16)    | 6 (0.4 - 15)    | 6 (1 - 13)       | 6 (2 - 12)      | 7 (3 - 11)    | 7 (4 - 12)     | 8 (4 - 13)    | 8 (3 - 15)   | 9 (3 - 18)   |

### Supplementary Figure V

Funnel plots for each analysis. Funnel plots are plots of sample size versus log odds, as conventional funnel plots may be inaccurate in estimates of rare proportions.

*Vascular findings*

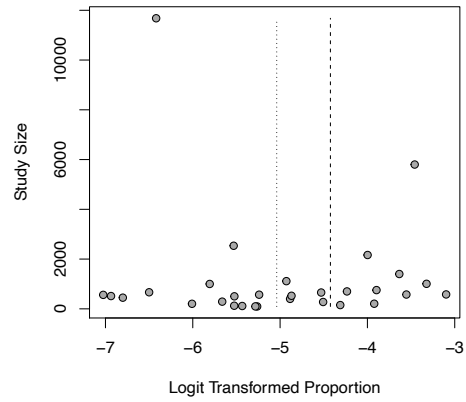

*Neoplastic findings*

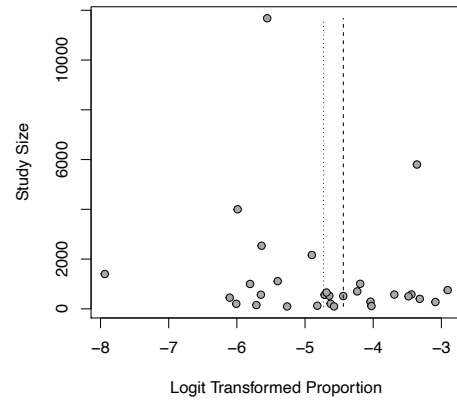

*Other findings*

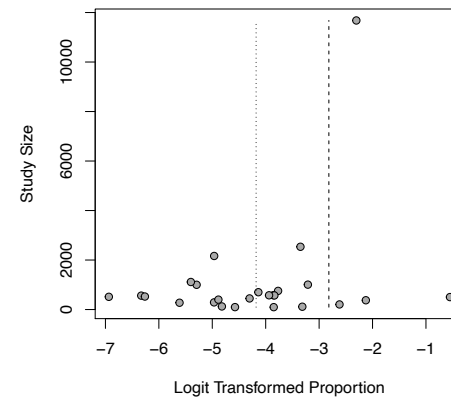

**Supplementary Table VI**

Regression coefficients for publication year (newer versus older) from multivariable meta-regression models additionally adjusted for age.

| <b>Analysis</b>         | <b><math>\beta</math> (95%CI)</b> | <b>p-value</b> |
|-------------------------|-----------------------------------|----------------|
| Vascular                |                                   |                |
| <i>Aneurysm</i>         | -0.000774 (-0.00301 - 0.00147)    | 0.498          |
| <i>Cavernoma</i>        | 0.00171 (-0.000445 - 0.00386)     | 0.120          |
| <i>Other vascular</i>   | -0.000431 (-0.0029 - 0.00204)     | 0.732          |
| <i>Any vascular</i>     | 3.73e-05 (-0.00323 - 0.00331)     | 0.982          |
| Neoplastic              |                                   |                |
| <i>Meningioma</i>       | 0.00289 (0.000934 - 0.00485)      | 0.004          |
| <i>Pituitary</i>        | 0.00166 (0.00023 - 0.00308)       | 0.023          |
| <i>Glioma</i>           | 0.000947 (7.06e-05 - 0.00182)     | 0.034          |
| <i>Other neoplastic</i> | 0.00102 (-0.00102 - 0.00307)      | 0.326          |
| <i>Any neoplastic</i>   | 0.00416 (0.00206 - 0.00627)       | <0.001         |
| Chiari malformation     | 0.00115 (-0.00192 - 0.00422)      | 0.464          |
| Pineal cyst             | 0.00302 (-0.00462 - 0.0107)       | 0.438          |
| Arachnoid cyst          | 0.00122 (-0.00194 - 0.00438)      | 0.450          |

**Supplementary Table VII**

Proportions (findings per 1,000 scans) for each analysis with versus without contrast estimated from meta-regression regression models additionally adjusted for age. Proportions relate to the median age for the analysis in question.

| <b>Analysis</b>         | <b><math>\beta</math> (95%CI)</b> | <b>Contrast</b>     | <b>No contrast</b>  | <b>p-value</b> |
|-------------------------|-----------------------------------|---------------------|---------------------|----------------|
| Vascular                |                                   |                     |                     |                |
| <i>Aneurysm</i>         | 0.0111 (-0.0224 - 0.0447)         | 2.87 (0.466 - 6.68) | 1.62 (0.086 - 4.34) | 0.515          |
| <i>Cavernoma</i>        | -0.00663 (-0.0385 - 0.0252)       | 2.66 (0.409 - 6.24) | 3.51 (1.22 - 6.67)  | 0.683          |
| <i>Other vascular</i>   | 0.0067 (-0.0258 - 0.0392)         | 1.08 (0 - 3.73)     | 0.561 (0 - 2.61)    | 0.686          |
| <i>Any vascular</i>     | -0.0026 (-0.0472 - 0.042)         | 8.25 (2.82 - 16)    | 8.76 (3.87 - 15.3)  | 0.909          |
| Neoplastic              |                                   |                     |                     |                |
| <i>Meningioma</i>       | 0.0056 (-0.0298 - 0.041)          | 6.44 (2.54 - 11.8)  | 5.5 (2.21 - 9.96)   | 0.756          |
| <i>Pituitary</i>        | 0.00537 (-0.019 - 0.0297)         | 2.45 (0.621 - 5.11) | 1.85 (0.528 - 3.73) | 0.666          |
| <i>Glioma</i>           | -0.00526 (-0.0211 - 0.0105)       | 0.0484 (0 - 0.645)  | 0.244 (0 - 0.951)   | 0.514          |
| <i>Other neoplastic</i> | -0.00105 (-0.0321 - 0.03)         | 1.82 (0.0913 - 4.9) | 1.93 (0.285 - 4.53) | 0.947          |
| <i>Any neoplastic</i>   | 0.00215 (-0.0394 - 0.0437)        | 13.2 (6.56 - 21.8)  | 12.7 (7.03 - 19.7)  | 0.919          |
| Chiari malformation     | 0.0153 (-0.026 - 0.0567)          | 4.01 (0.607 - 9.52) | 2.06 (0.0606 - 5.8) | 0.467          |
| Pineal cyst             | -0.0445 (-0.147 - 0.0578)         | 2.99 (0 - 20.1)     | 10.7 (1.06 - 28.1)  | 0.394          |
| Arachnoid cyst          | 0.0242 (-0.0175 - 0.0658)         | 11.5 (5.03 - 20.1)  | 6.63 (2.89 - 11.6)  | 0.255          |
